# Supplementary material for: Supramolecular organization of melem for the synthesis of photoactive porous carbon nitride rods
Source: Royal Society of Chemistry journal article supplement (doi:10.1039/d1nr06974h), 2021-01-01
Supplement: d1nr06974h1.pdf [file d1nr06974h1.pdf]

## Electronic Supplementary Information

### **Supramolecular organization of melem for the synthesis of photoactive porous carbon nitride rods**

Jiawei Xia,<sup>a,b</sup> Gabriel Mark,<sup>b</sup> Michael Volokh,<sup>b</sup> Yuanxing Fang,<sup>c</sup> Haiqun Chen,<sup>a</sup> Xinchun Wang<sup>c</sup> and Menny Shalom<sup>b\*</sup>

<sup>a</sup>Key Laboratory of Advanced Catalytic Materials and Technology, Advanced Catalysis and Green Manufacturing Collaborative Innovation Center, Changzhou University, Changzhou, Jiangsu Province 213164, China.

<sup>b</sup>Department of Chemistry and Ilse Katz Institute for Nanoscale Science and Technology, Ben-Gurion University of the Negev, Beer-Sheva 8410501, Israel.  
E-mail: mennysh@bgu.ac.il

<sup>c</sup>State Key Laboratory of Photocatalysis on Energy and Environment College of Chemistry, Fuzhou University, Fuzhou 350116, China

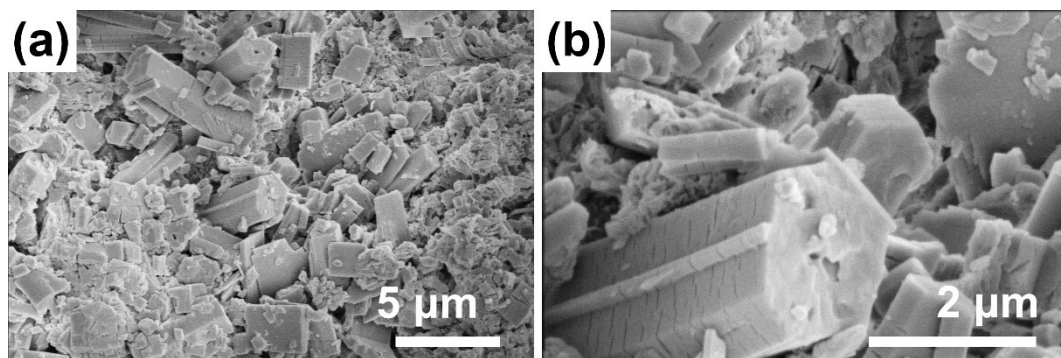

**Fig. S1** SEM images of Me at different magnifications.

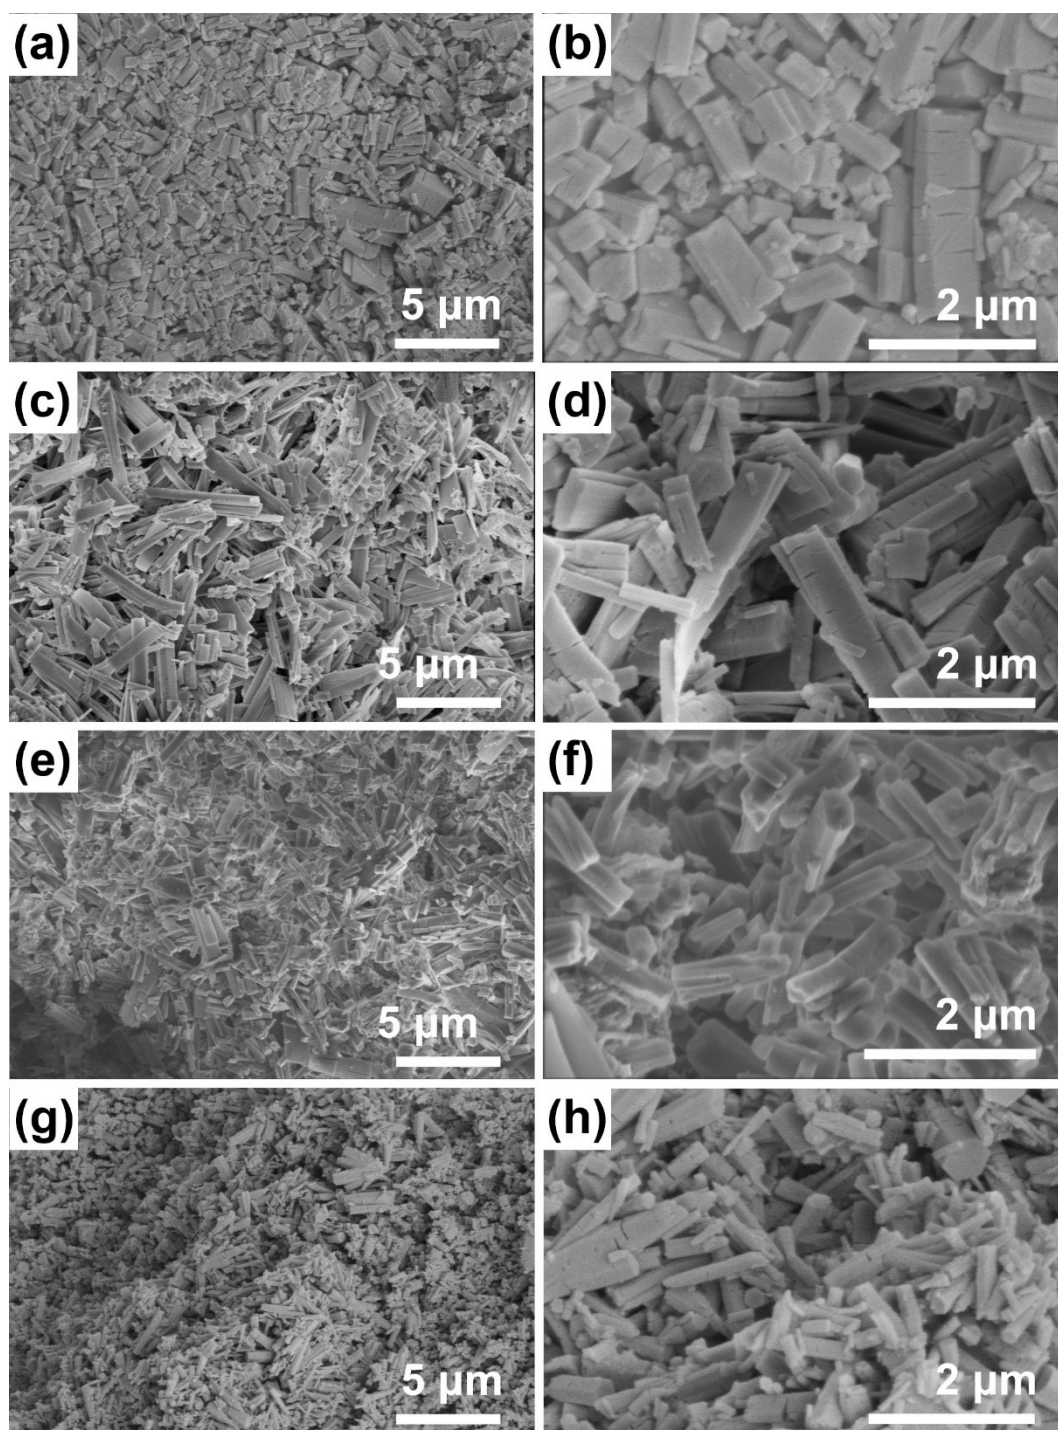

**Fig. S2** SEM images of (a, b)  $\text{MeCl}_{0.2}$ , (c, d)  $\text{MeCl}_{0.4}$ , (e, f)  $\text{MeCl}_{0.6}$ , and (g, h)  $\text{MeCl}_{0.8}$  at different magnifications.

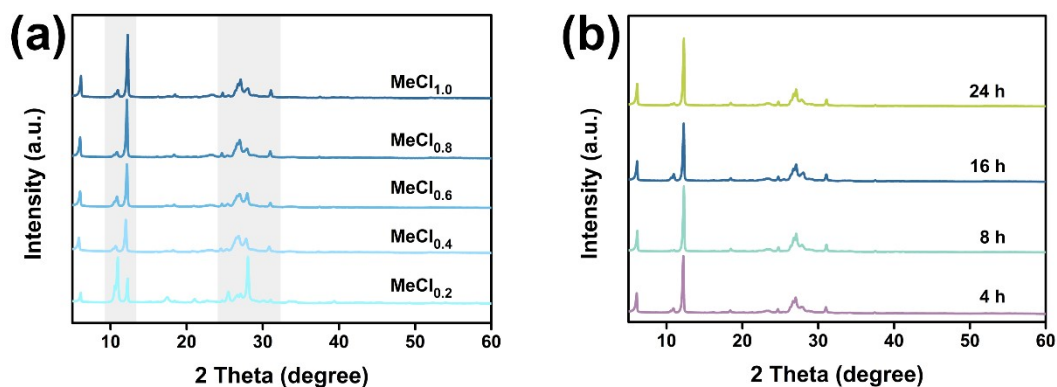

**Fig. S3** (a) XRD patterns of  $\text{MeCl}_x$  synthesized in aqueous solutions of different HCl concentrations; (b) XRD patterns of  $\text{MeCl}_{1.0}$  synthesized with different shaking times.

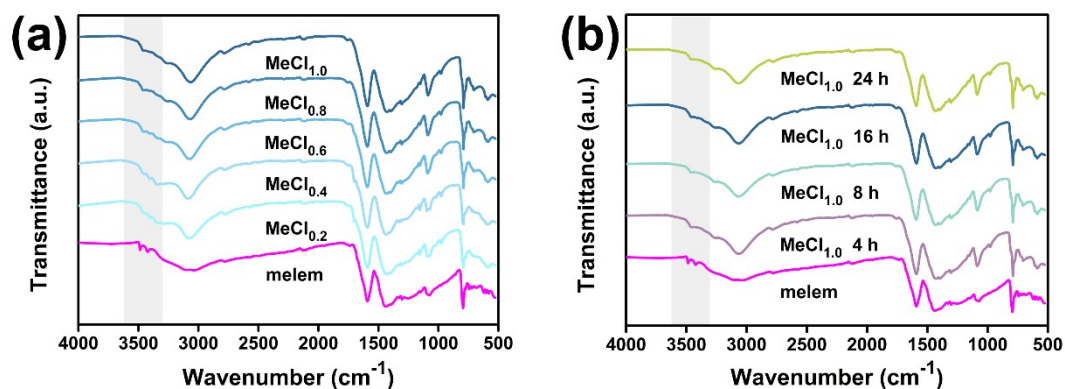

**Fig. S4** (a) FTIR spectra of  $\text{MeCl}_x$  synthesized in aqueous solutions of different HCl concentrations; (b) FTIR spectra of  $\text{MeCl}_{1.0}$  synthesized with different shaking times. Untreated bulk melem for comparison (bottom, magenta spectra)

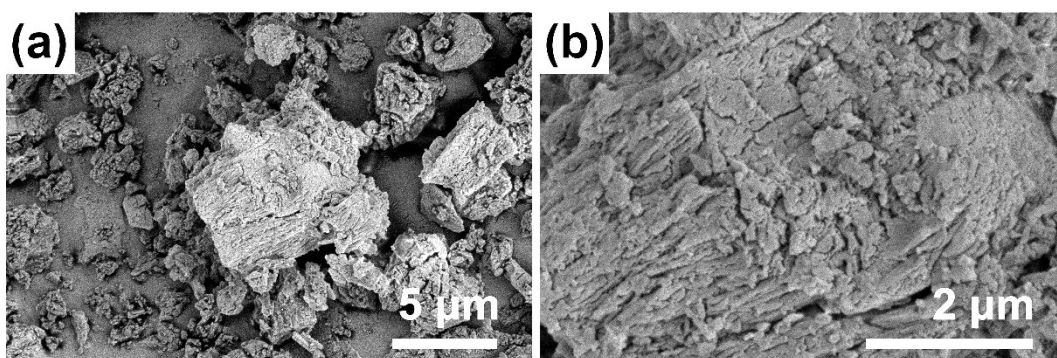

**Fig. S5** SEM images of unwashed HCl-treated melem (melem+HCl) at different magnifications.

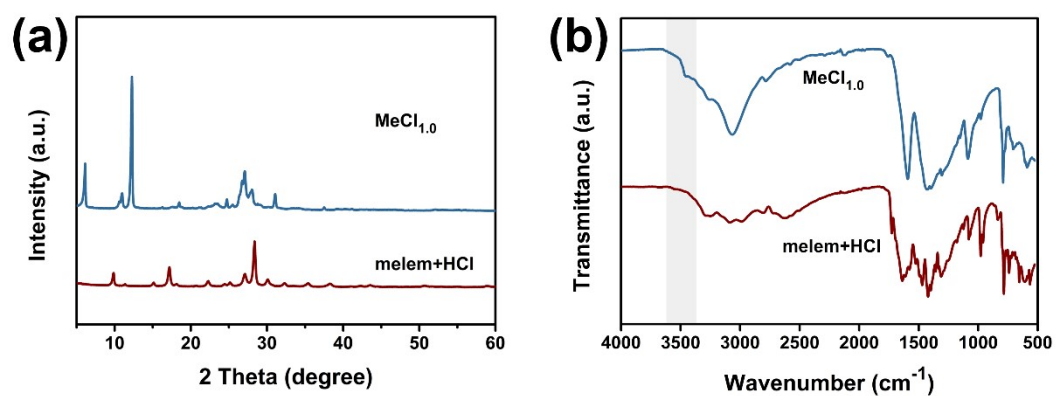

**Fig. S6** (a) XRD patterns and (b) FTIR spectra of MeCl<sub>1.0</sub> and unwashed HCl-treated melem (melem+HCl).

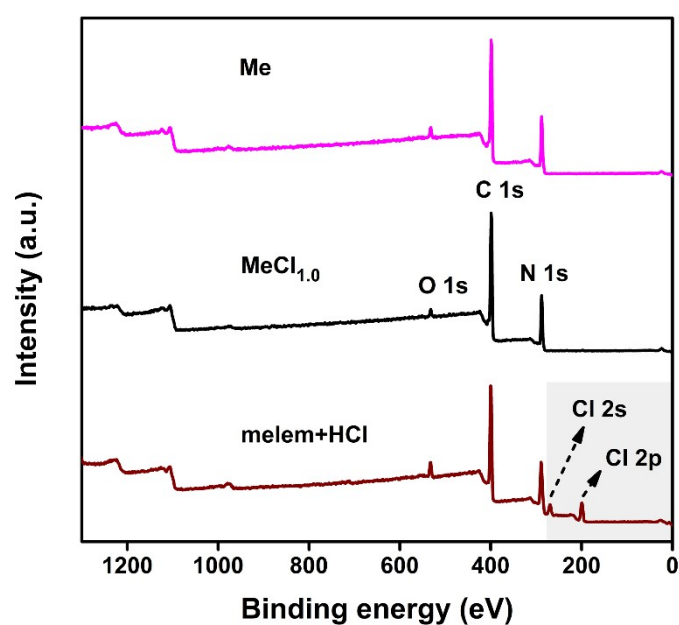

**Fig. S7** Global XPS spectra of Me, MeCl<sub>1.0</sub>, and melem+HCl.

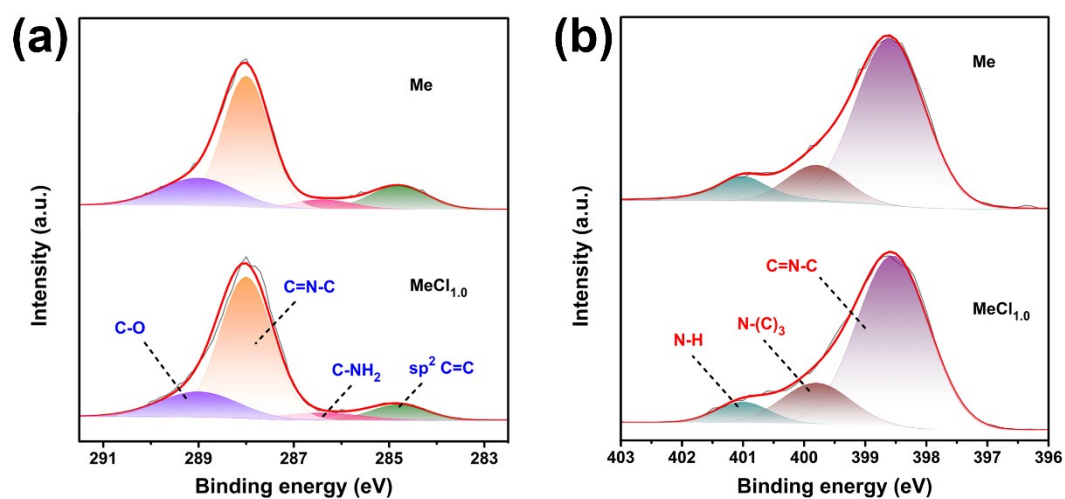

**Fig. S8** (a) C 1s and (b) N 1s high-resolution XPS spectra of Me and MeCl<sub>1.0</sub>.

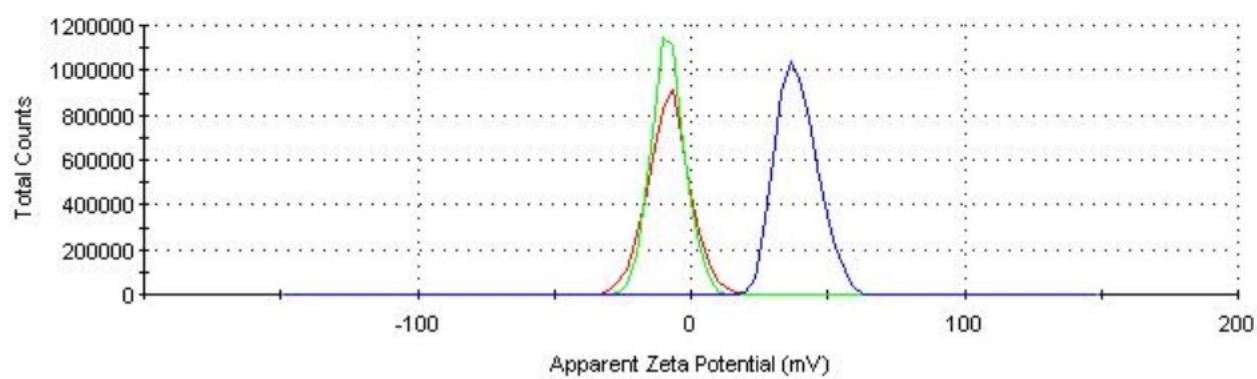

**Fig. S9** Zeta-potential measurements of Me (green), MeCl<sub>1.0</sub> (red), and melem+HCl (blue) aqueous suspensions.



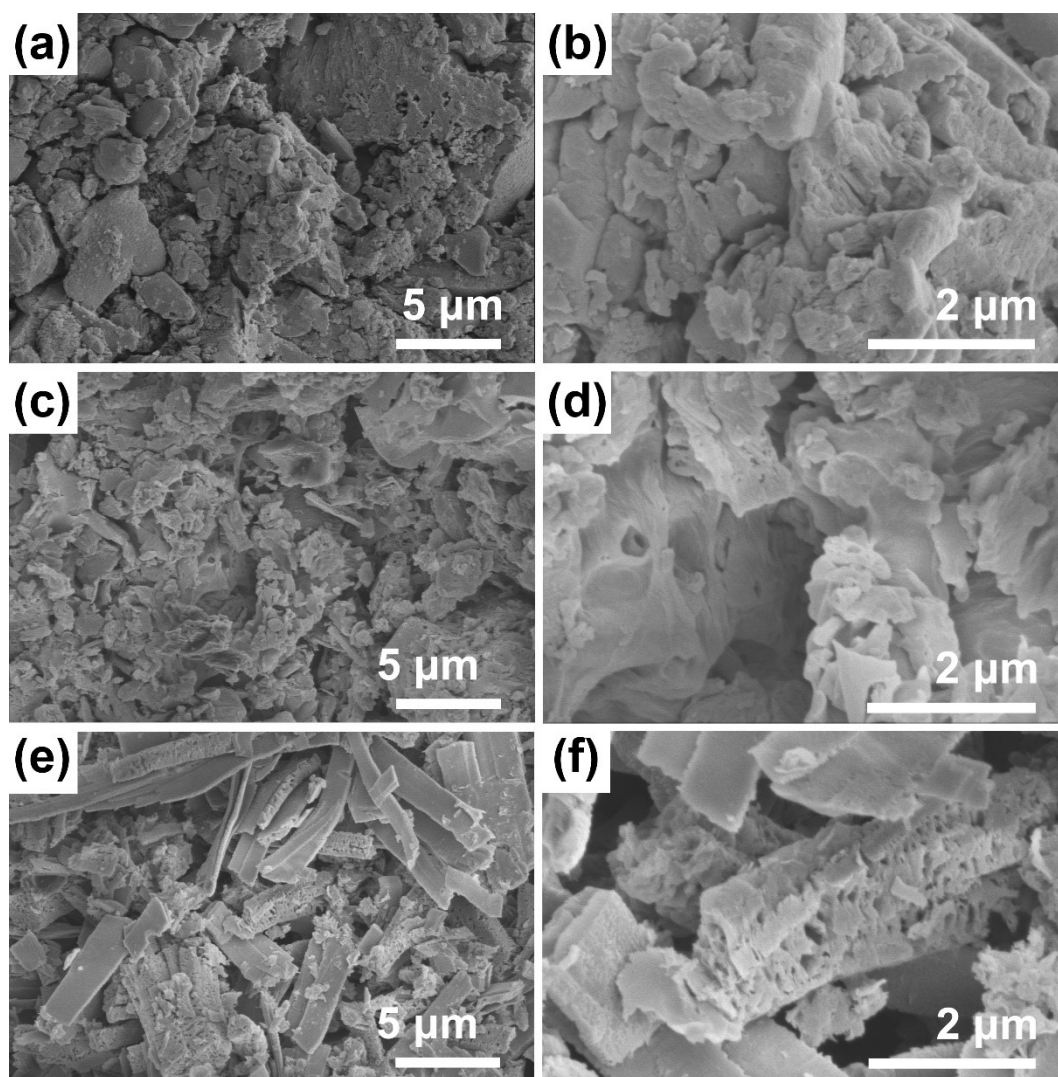

**Fig. S10** SEM images of (a, b) CN-M, (c, d) CN-melem, and (e, f) CN-Me at different magnifications.

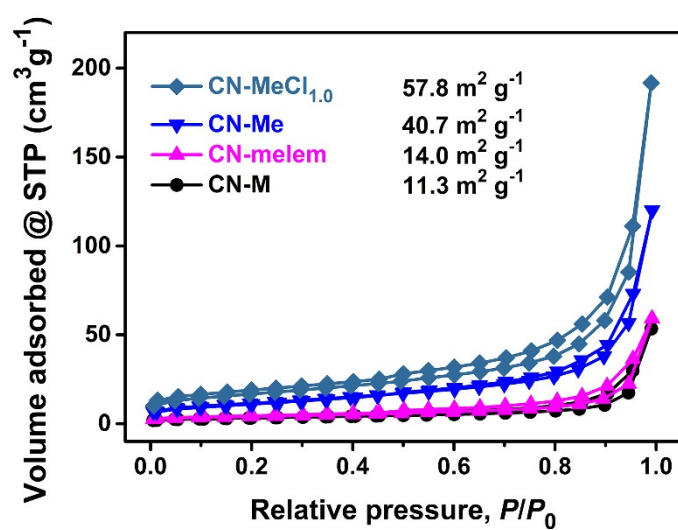

**Fig. S11** Nitrogen adsorption-desorption isotherms (77 K) and specific surface area analysis according to the Brunauer-Emmett-Teller (BET) model.

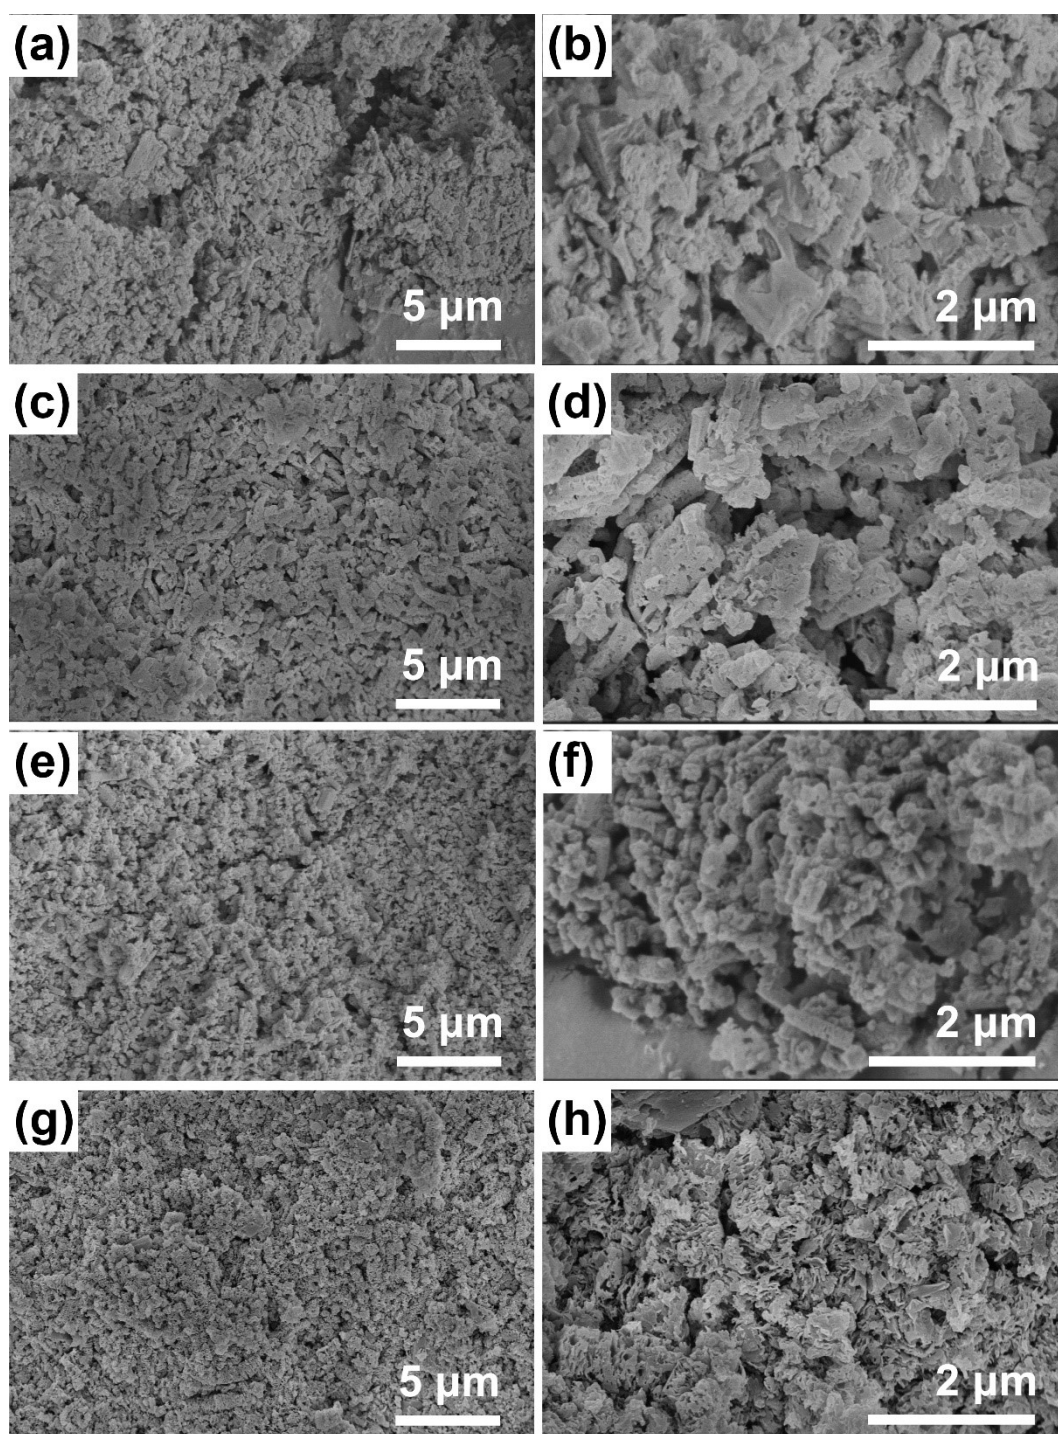

**Fig. S12** SEM images of (a, b) CN-MeCl<sub>0.2</sub>, (c, d) CN-MeCl<sub>0.4</sub>, (e, f) CN-MeCl<sub>0.6</sub>, and (g, h) CN-MeCl<sub>0.8</sub> at different magnifications.



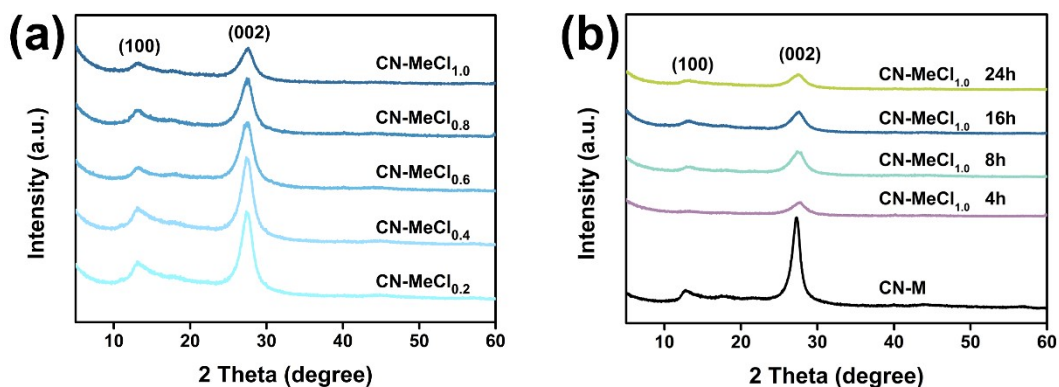

**Fig. S13** (a) XRD patterns of CN materials from  $\text{MeCl}_x$ , synthesized in aqueous solutions of different HCl concentrations; (b) XRD patterns of CN-M compared with CN materials from  $\text{MeCl}_{1.0}$  synthesized with different shaking times.

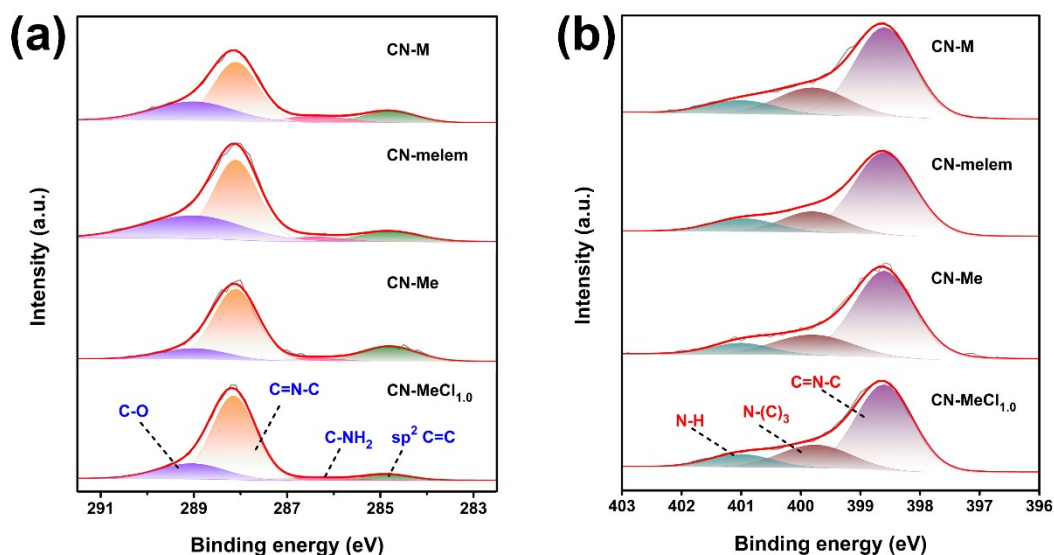

**Fig. S14** (a) C 1s and (b) N 1s high-resolution XPS spectra of CN-M, CN-melem, CN-Me, and  $\text{CN-MeCl}_{1.0}$ .

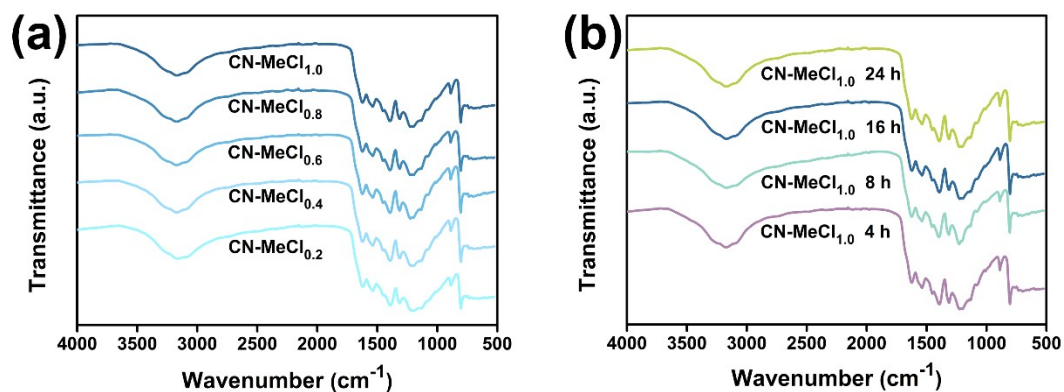

**Fig. S15** (a) FTIR spectra of CN materials from  $\text{MeCl}_x$ , synthesized in aqueous solutions of different HCl concentrations; (b) FTIR spectra of CN materials from  $\text{MeCl}_{1.0}$  synthesized with different shaking times.

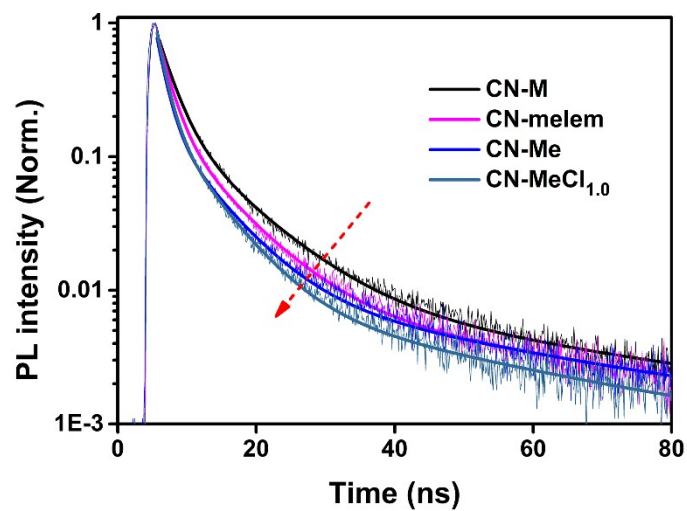

**Fig. S16** Normalized time-resolved PL decay spectra of different CN materials (all samples were excited at  $\lambda_{\text{ex}} = 370 \text{ nm}$ ).

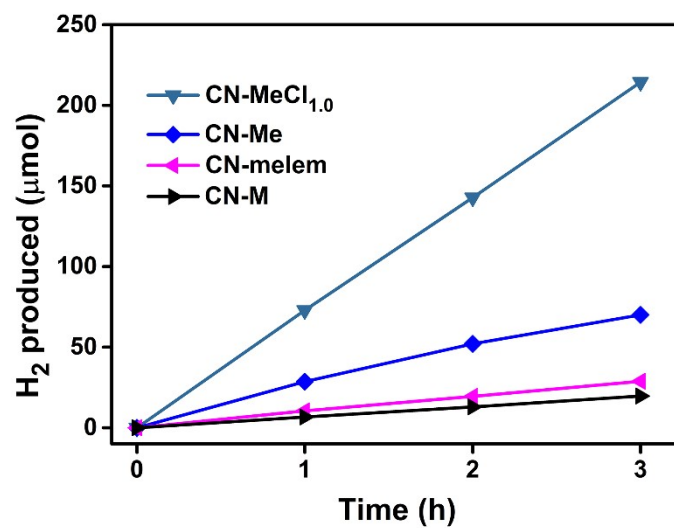

**Fig. S17** Time course of  $\text{H}_2$  evolution under white LED irradiation, catalyzed by different CN materials.

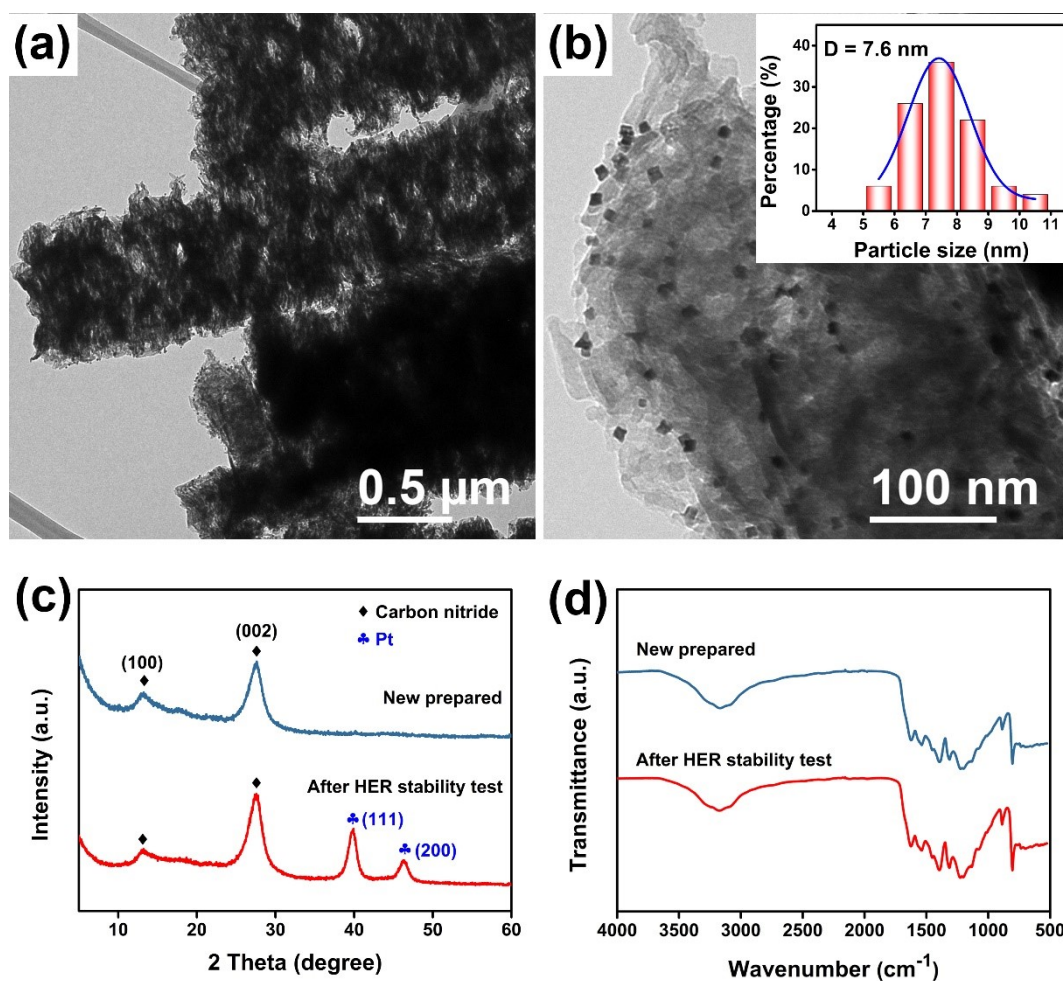

**Fig. S18** (a,b) TEM images of CN-MeCl<sub>1.0</sub> at two different magnifications after an HER stability test. The inset in (b) presents a size distribution histogram of Pt nanoparticles; (c) XRD patterns and (d) FTIR spectra of CN-MeCl<sub>1.0</sub> before and after HER stability test.

The two diffraction peaks located at  $2\theta = 39.8^\circ$  and  $2\theta = 46.2^\circ$  are assigned to the (111) and (200) planes of face center cubic (fcc) Pt nanoparticles, which are photodeposited onto the surface of CN material. The XRD patterns and FTIR spectra of CN-MeCl<sub>1.0</sub> do not reveal noticeable change before and after HER stability test, indicating a good structural stability.

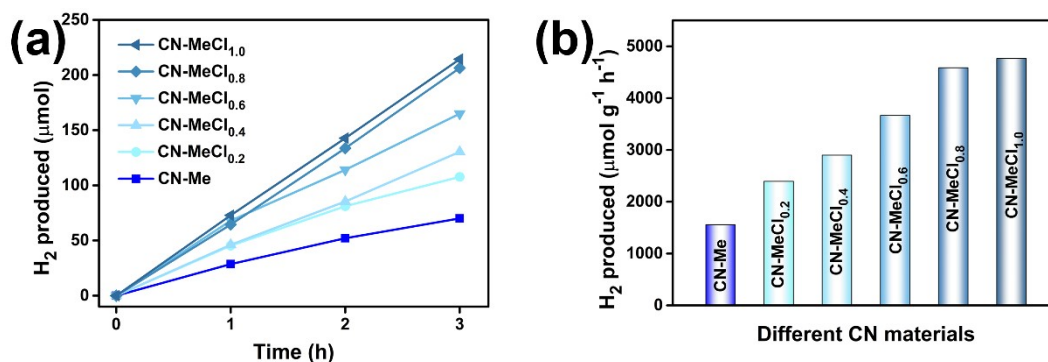

**Fig. S19** (a) Time course of  $H_2$  evolution under white LED irradiation, catalyzed by CN materials synthesized in aqueous solutions of different HCl concentrations; (b) The corresponding HER rate at the 3<sup>rd</sup> hour.

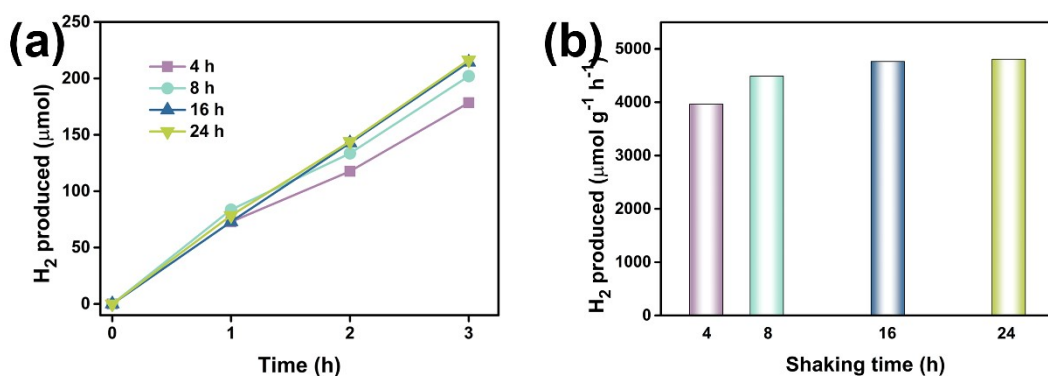

**Fig. S20** (a) Time course of  $H_2$  evolution under white LED irradiation, catalyzed by CN materials synthesized from MeCl<sub>1.0</sub> with different shaking times; (b) Corresponding HER rate at the 3<sup>rd</sup> hour.

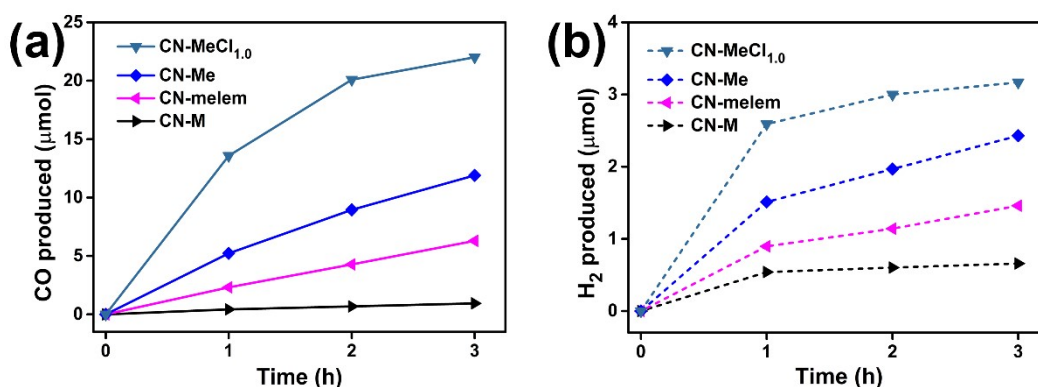

**Fig. S21** Time course of generated (a) CO and (b)  $H_2$  under white LED irradiation, catalyzed by different CN materials.

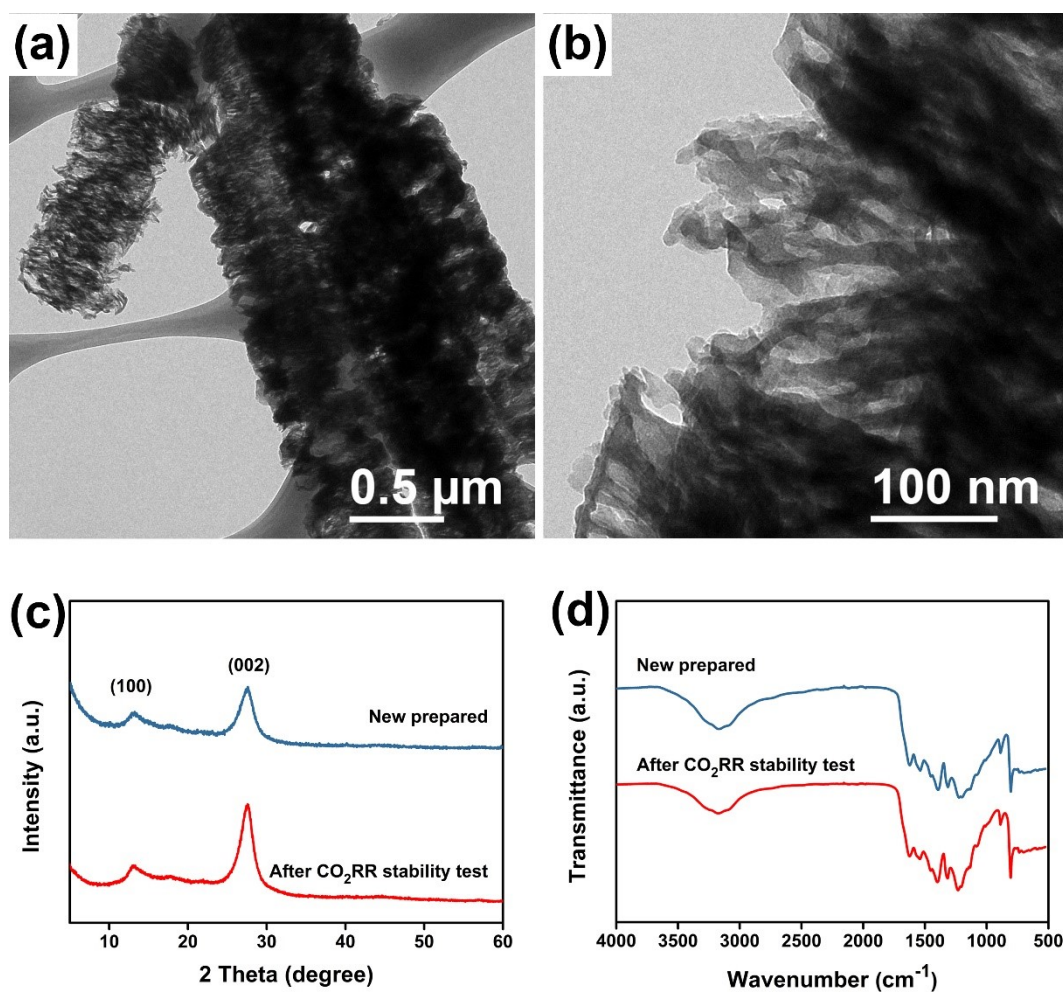

**Fig. S22** (a, b) TEM images of CN-MeCl<sub>1.0</sub> after CO<sub>2</sub>RR stability test at two different magnifications; (c) XRD patterns and (d) FTIR spectra of CN-MeCl<sub>1.0</sub> before and after CO<sub>2</sub>RR stability test.

The XRD patterns and FTIR spectra of CN-MeCl<sub>1.0</sub> do not reveal a noticeable change before and after a HER stability test, indicating a good structural stability.



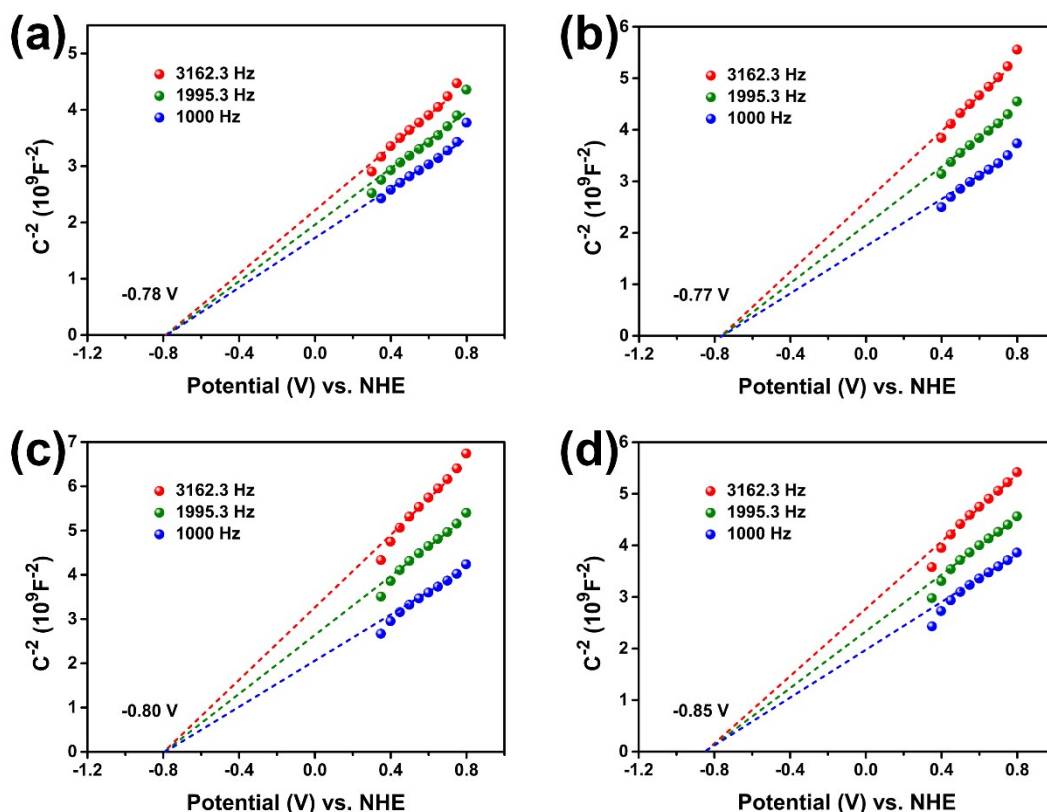

**Fig. S23** Mott-Schottky plots of (a) CN-M, (b) CN-melem, (c) CN-Me, and (d) CN-MeCl<sub>1.0</sub>, measured in 1.0 M Na<sub>2</sub>SO<sub>4</sub> aqueous solution as the electrolyte.

**Table S1.** PL lifetimes estimated from time-resolved PL spectra decay curves according to a triple-exponential function fitting.

| Catalyst               | $\tau_1$ (ns) | $A_1$ (%) | $\tau_2$ (ns) | $A_2$ (%) | $\tau_3$ (ns) | $A_3$ (%) | $\tau_{av.}$ (ns) |
|------------------------|---------------|-----------|---------------|-----------|---------------|-----------|-------------------|
| CN-M                   | 8.24          | 45.91     | 49.53         | 16.33     | 2.16          | 37.76     | 34.17             |
| CN-melem               | 1.75          | 35.87     | 7.11          | 47.19     | 45.64         | 16.95     | 32.26             |
| CN-Me                  | 1.32          | 24.24     | 6.17          | 46.86     | 39.03         | 18.91     | 28.58             |
| CN-MeCl <sub>1.0</sub> | 5.68          | 47.33     | 34.98         | 14.91     | 1.32          | 37.76     | 23.61             |

The PL lifetimes ( $\tau_{av.}$ ) were estimated from time-resolved PL spectra decay curves fitted to a

triple-exponential function:  $\tau = \frac{\sum_{i=1}^n A_i \tau_i^2}{\sum_{i=1}^n A_i \tau_i}$ , where  $\tau_i$  is the lifetime and  $A_i$  is the amplitude of the  $i^{th}$  component.

**Table S2.** Comparison of the properties of CN materials used as HER photocatalysts

| Catalyst                                            | Method                                                                                                                                 | Light source                                               | Catalyst mass | Experimental conditions       | Hydrogen evolution rate ( $\mu\text{mol g}^{-1} \text{h}^{-1}$ ) | AQE (%)                                    | Ref.      |
|-----------------------------------------------------|----------------------------------------------------------------------------------------------------------------------------------------|------------------------------------------------------------|---------------|-------------------------------|------------------------------------------------------------------|--------------------------------------------|-----------|
| CN from melem-based supramolecular hexagonal rods   | Supramolecular assembly of melem exfoliated by HCl, followed by thermal condensation                                                   | 100 W white LED ( $\lambda > 410 \text{ nm}$ ), water bath | 15 mg         | 3 wt.% Pt, 10 vol.% TEOA      | 4764                                                             | 6.8 ( $\lambda = 405 \text{ nm}$ )         | This work |
| Porous CN                                           | Thermal condensation of melamine-halogen complex                                                                                       | 50 W white LED ( $\lambda > 410 \text{ nm}$ )              | 15 mg         | 3 wt.% Pt, 10% vol.% TEOA     | 1815                                                             | 3.2 ( $\lambda = 405 \text{ nm}$ )         | [1]       |
| Hierarchical rod-like graphitic CN                  | Ultrasound-assisted supramolecular assembly of melem, followed by thermal condensation                                                 | 300 W Xe lamp ( $\lambda > 420 \text{ nm}$ )               | 100 mg        | 3 wt.% Pt, 10% vol.% TEOA     | 2460                                                             | —                                          | [2]       |
| Graphene-like CN rich in N vacancies                | Thermal polymerization of melamine using graphene oxide as a sacrificial template                                                      | 300 W Xe lamp ( $\lambda > 420 \text{ nm}$ )               | 100 mg        | 3 wt.% Pt, 25% vol.% methanol | 3171                                                             | $\sim 6$ ( $\lambda = 421 \text{ nm}$ )    | [3]       |
| High crystalline CN                                 | Rapid polymerization of melamine powder                                                                                                | 300 W Xe lamp ( $\lambda > 420 \text{ nm}$ )               | 50 mg         | 3 wt.% Pt, 10 vol.% TEOA      | 339.4                                                            | 3.8 ( $\lambda = 420 \text{ nm}$ )         | [4]       |
| Macroscopic foam-like holey ultrathin CN nanosheets | Self-modification of polymeric melon units through long-time thermally treating bulk g- $\text{C}_3\text{N}_4$ under an air atmosphere | 300 W Xe lamp ( $\lambda > 400 \text{ nm}$ )               | 20 mg         | 3 wt.% Pt, 10 vol.% TEOA      | 1144                                                             | 4.03 ( $\lambda = 420 \pm 15 \text{ nm}$ ) | [5]       |
| Crystalline CN                                      | Condensation of melamine powder, followed by a sequential heating in KCl-LiCl mixed salt                                               | 300 W Xe lamp                                              | 50 mg         | 3 wt.% Pt, 10 vol.% TEOA      | 1280                                                             | $\sim 6.0$ ( $\lambda = 405 \text{ nm}$ )  | [6]       |
| Holey CN nanosheets                                 | Condensation of melamine powder in a big crucible with empty space covered with two Z204 catalysts                                     | 300 W Xe lamp ( $\lambda > 400 \text{ nm}$ )               | 50 mg         | 3 wt.% Pt, 10 vol.% TEOA      | 2320                                                             | —                                          | [7]       |
| Defect engineering-modified atomic layered CN       | High-temperature treatment and the two-step thermal exfoliation process                                                                | Xe lamp ( $\lambda > 420 \text{ nm}$ )                     | 50 mg         | 3 wt.% Pt, 10 vol.% TEOA      | 3700                                                             | 14.98 ( $\lambda > 420 \text{ nm}$ )       | [8]       |
| Polymeric CN nanotubes                              | Condensation of trithiocyanuric acid-melamine supramolecular assembly, followed by further heating treatment in NaCl salt              | 300 W Xe lamp ( $\lambda > 420 \text{ nm}$ )               | 50 mg         | 1 wt.% Pt, 10 vol.% TEOA      | 4350                                                             | 3.34 ( $\lambda = 420 \text{ nm}$ )        | [9]       |
| Phenyl-bridged porous and hollow CN sphere          | Condensation of trimesic acid-doped cyanuric acid-melamine supramolecular assembly                                                     | 300 W Xe lamp ( $\lambda > 400 \text{ nm}$ )               | 20 mg         | 3 wt.% Pt, 10 vol.% TEOA      | 4455                                                             | —                                          | [10]      |

### Electronic Supplementary Information References

- [1] J. Barrio, A. Grafmüller, J. Tzadikov, M. Shalom, *Appl. Catal. B*, 2018, **237**, 681.
- [2] Z. Huang, F. -W. Yan, G. -q. Yuan, *ACS Sustainable Chem. Eng.*, 2018, **6**, 3187.
- [3] R. Wang, X. Wang, X. Li, L. Pei, X. Gu, Z. Zheng, *Int. J. Hydrogen Energy*, 2021, **46**, 197.
- [4] L. Wang, Y. Hong, E. Liu, Z. Wang, J. Chen, S. Yang, J. Wang, X. Lin, J. Shi, *Int. J. Hydrogen*

*Energy*, 2020, **45**, 6425.

[5] Y. Li, R. Jin, Y. Xing, J. Li, S. Song, X. Liu, M. Li, R. Jin, *Adv. Energy Mater.*, 2016, **6**, 1601273.

[6] W. Ren, J. Cheng, H. Ou, C. Huang, M.M. Titirici, X. Wang, *ChemSusChem*, 2019, **12**, 3257.

[7] G. Li, Z. Xie, S. Chai, X. Chen, X. Wang, *Appl. Catal. B*, 2021, **283**, 119637.

[8] J. Zhang, J. Chen, Y. Wan, H. Liu, W. Chen, G. Wang, R. Wang, *ACS Appl. Mater. Interfaces*, 2020, **12**, 13805.

[9] Y. Wan, J. Zhang, J. Chen, Z. Liu, J. Fan, J. Zhang, G. Wang, R. Wang, *Chem. Eng. J.*, 2021, **417**, 127956.

[10] Y. Chen, Y. Qu, X. Zhou, D. Li, P. Xu, J. Sun, *ACS Appl. Mater. Interfaces*, 2020, **12**, 41527.
